# Supplementary material for: Synergism between CMG helicase and leading strand DNA polymerase at replication fork
Source: PubMed Central journal article supplement (PMC10511561; doi:10.1038/s41467-023-41506-0), 2023-09-20
Supplement: 41467_2023_41506_MOESM1_ESM.pdf [file 41467_2023_41506_MOESM1_ESM.pdf]

## Supplementary Information

### **Synergism between CMG Helicase and Leading Strand DNA Polymerase at Replication Fork**

Zhichun Xu<sup>1\*</sup>, Jianrong Feng<sup>2\*</sup>, Daqi Yu<sup>2\*</sup>, Yunjing, Huo<sup>1\*</sup>, Xiaohui Ma<sup>2\*</sup>, Wai Hei Lam<sup>1</sup>, Zheng Liu<sup>3</sup>, Xiang David Li<sup>3</sup>, Toyotaka Ishibashi<sup>2</sup>, Shangyu Dang<sup>2,4,5#</sup> & Yuanliang Zhai<sup>1#</sup>

\*These authors contributed equally to this work

#Co-corresponding authors

This document contains 10 Figures and 2 Tables

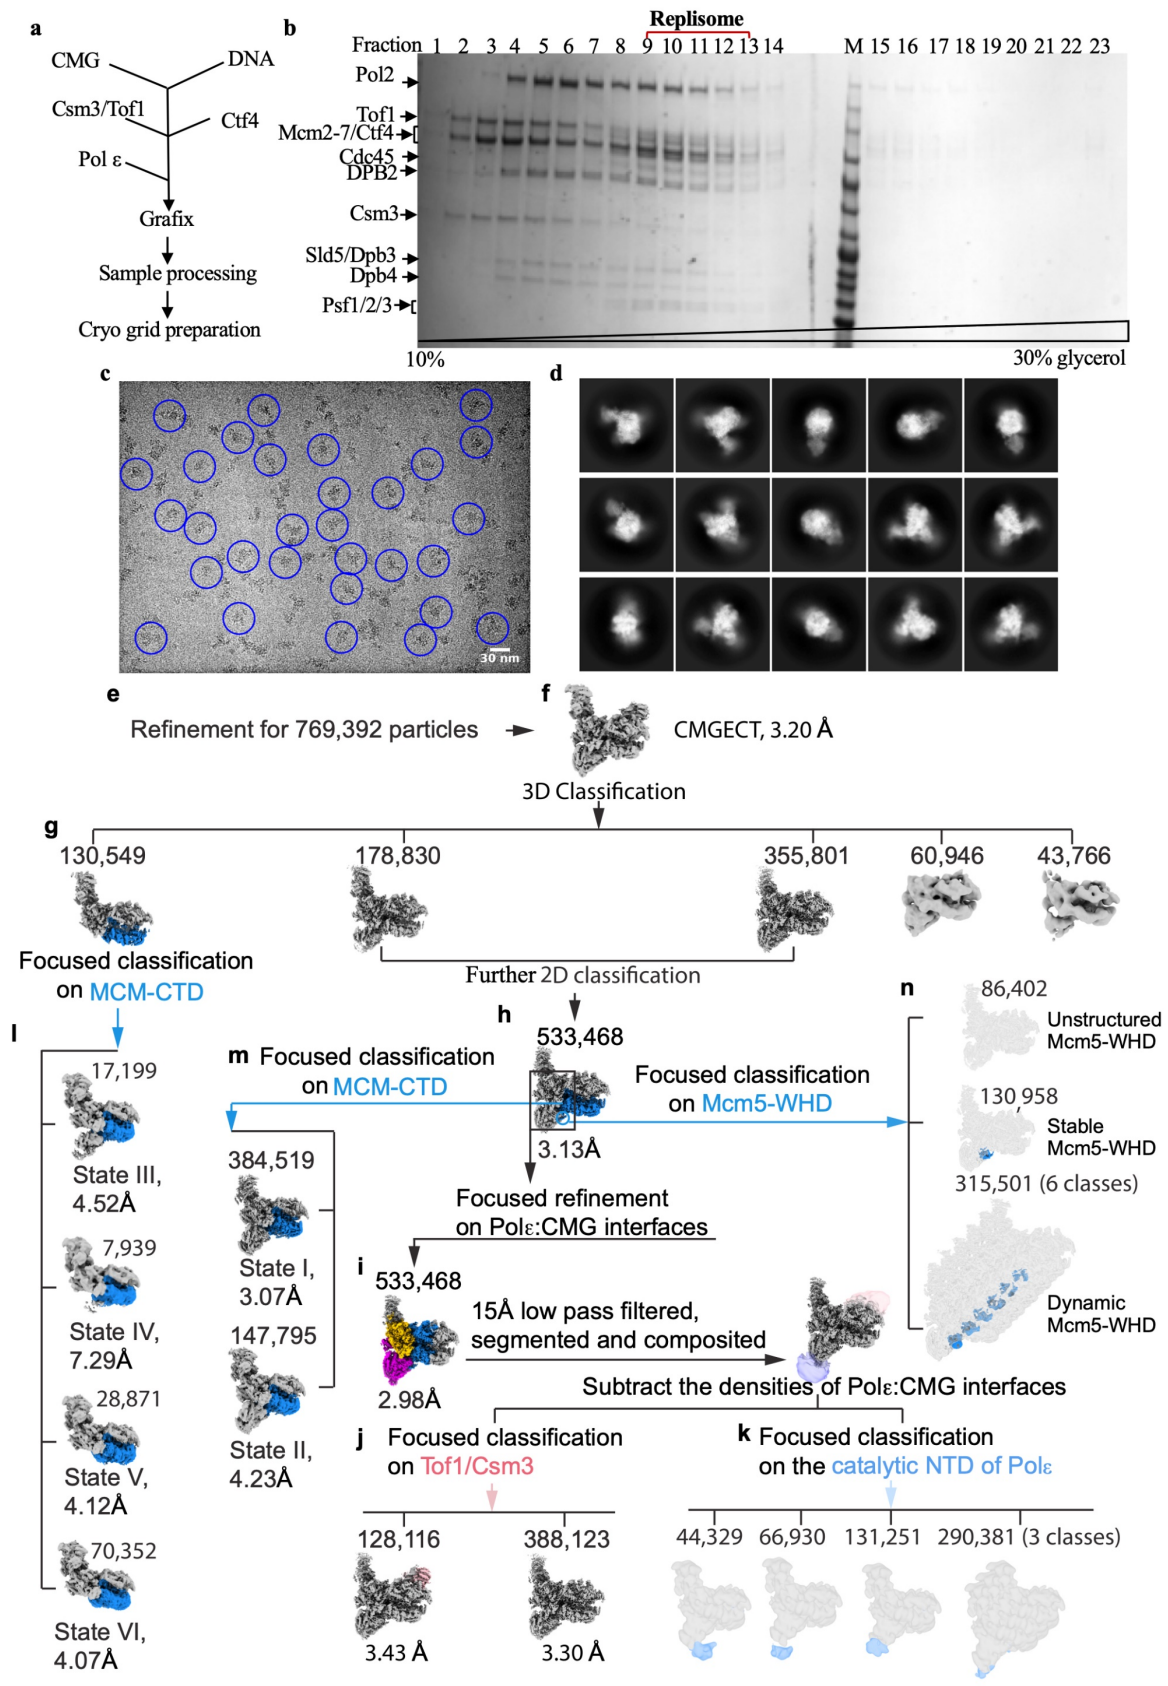

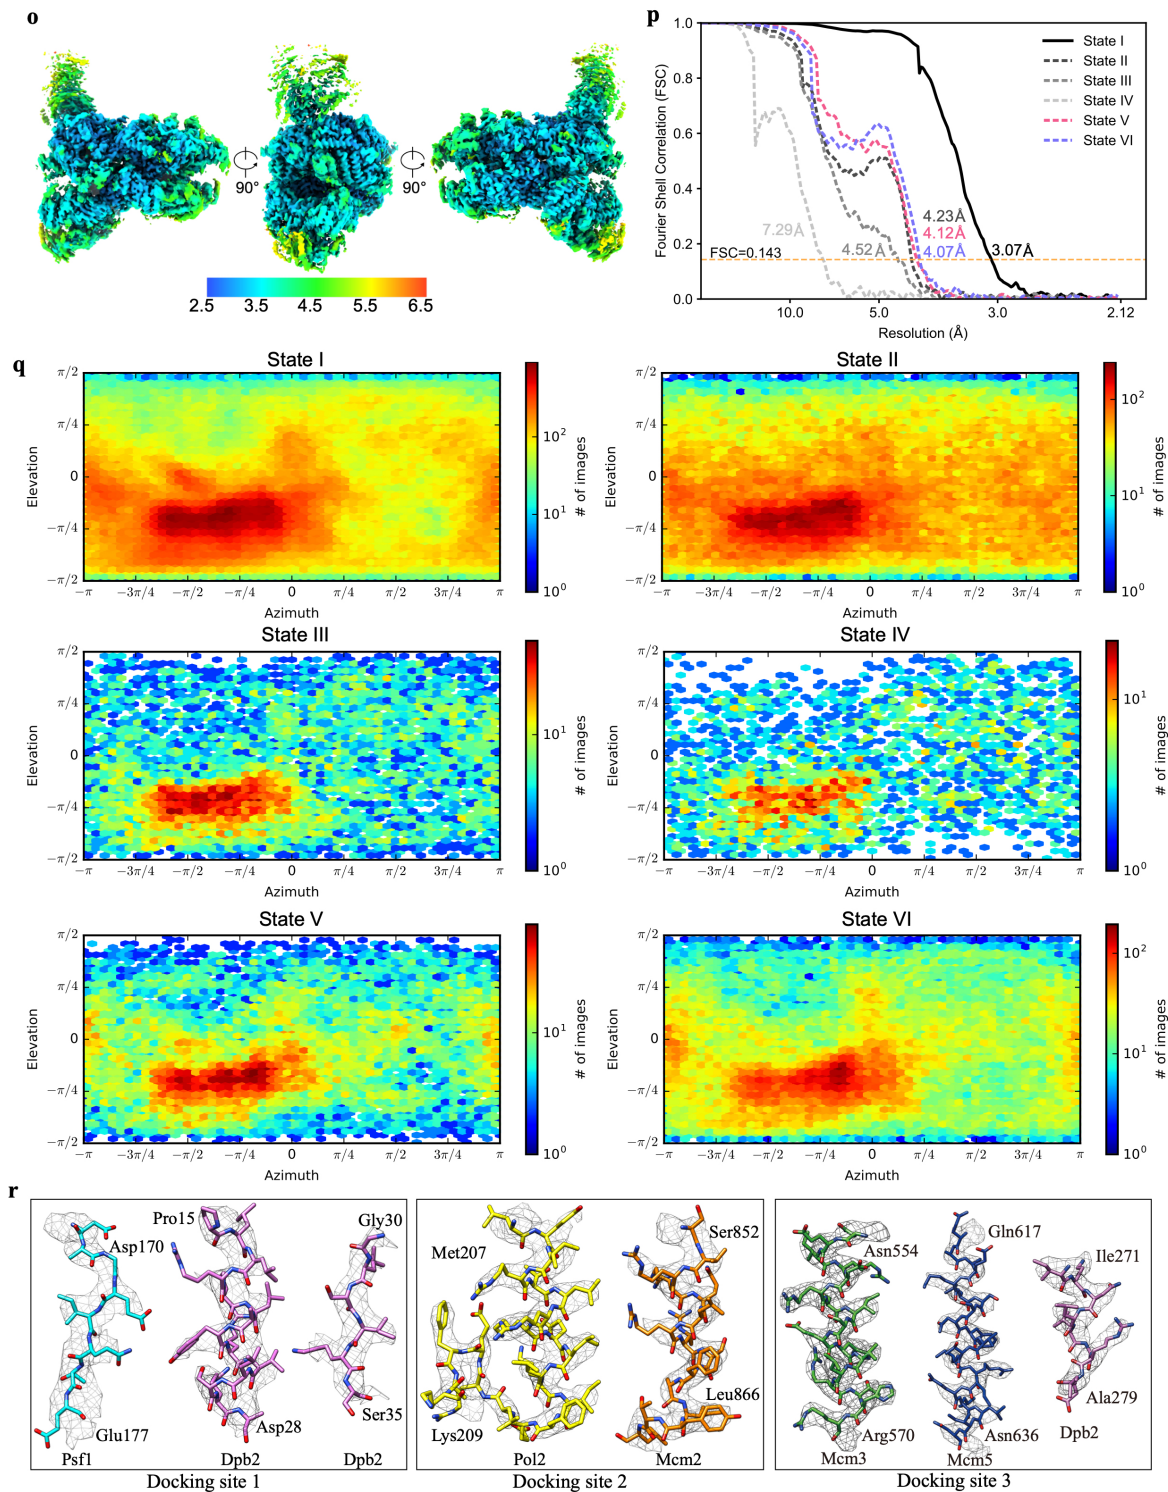

**Supplementary Figure 1. Sample preparation and structure determination of the replisome complexes.**

(a) A flowchart of the procedure for cryo sample preparation.

(b) Replisome complexes were subjected to 10-30% glycerol gradient centrifugation. Fractions were collected, resolved on SDS-PAGE and visualized by silver staining. This analysis showed that peak fractions (9-13) contain intact replisome complexes. Based on this result, similar

fractions containing crosslinked samples after grafix were pooled and processed for further EM analysis.

**(c)** A representative raw micrograph of cryo-EM data with replisome particles highlighted in blue circle.

**(d)** Representative 2D class averages of cryo-EM particles from reference-free classification.

**(e-n)** Workflow of image processing of the replisome particles. See Materials and Methods for details.

**(o)** Different views of the cryo-EM density map of the replisome (State I) colour-coded to indicate the range of the local resolution.

**(p)** FSC curves of the final density maps for the indicated replisome complexes in each state.

**(q)** Euler angle orientation distribution of the final particles in each state.

**(r)** Cryo-EM densities for indicated regions of the replisome.

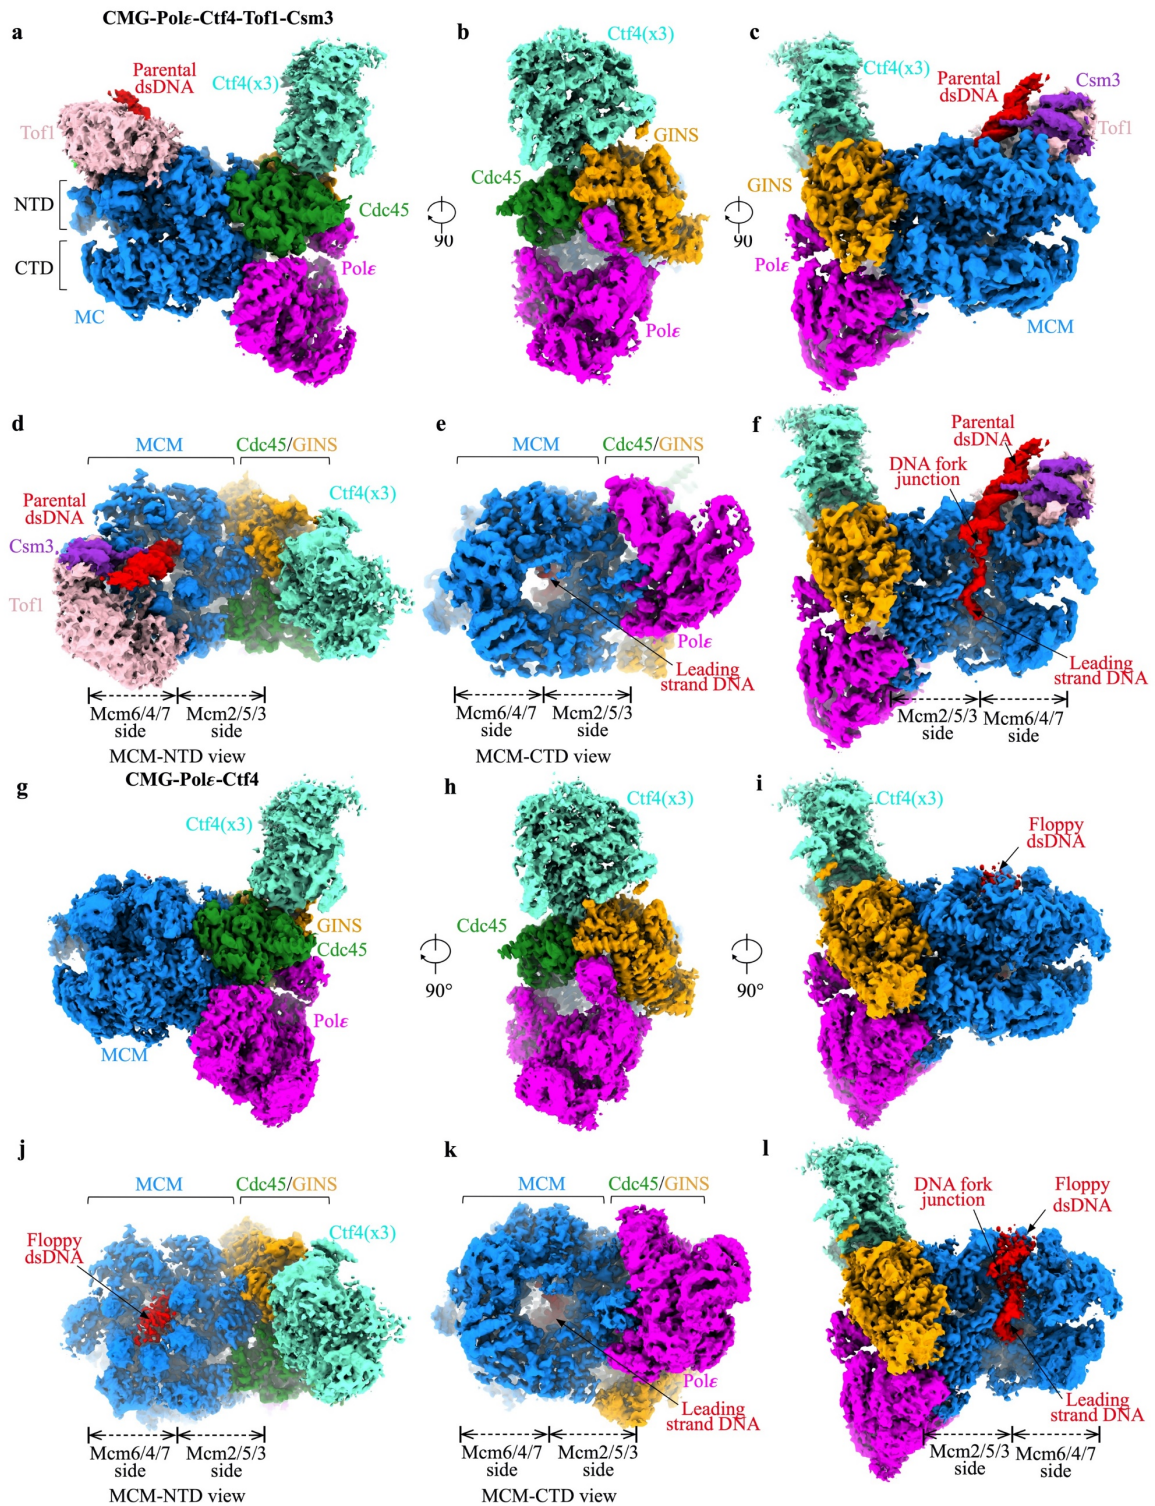

**Supplementary Figure 2. Overall structure of a leading-strand replisome at replication fork.**

(a-c) Side views of cryo-EM density map of the replisome CMG-Pol $\epsilon$ -Ctf4-Tof1-Csm3 at a preformed forked DNA, displayed with indicated rotations.

(d, e) Top NTD (d) and bottom CTD (e) of MCM views of the replisome structure.

**(f)** Same as **(c)** but with Mcm3 and Mcm7 removed to highlight the conformation of fork DNA inside the MCM ring.

**(g-l)** Same as **(a-i)** but with the absence of Tof1 and Csm3 highlighting a flexible parental duplex DNA.

MCM ring, Cdc45, GINS, Pol $\epsilon$ , Ctf4, Tof1, Csm3 and DNA are color coded and labelled as indicated.

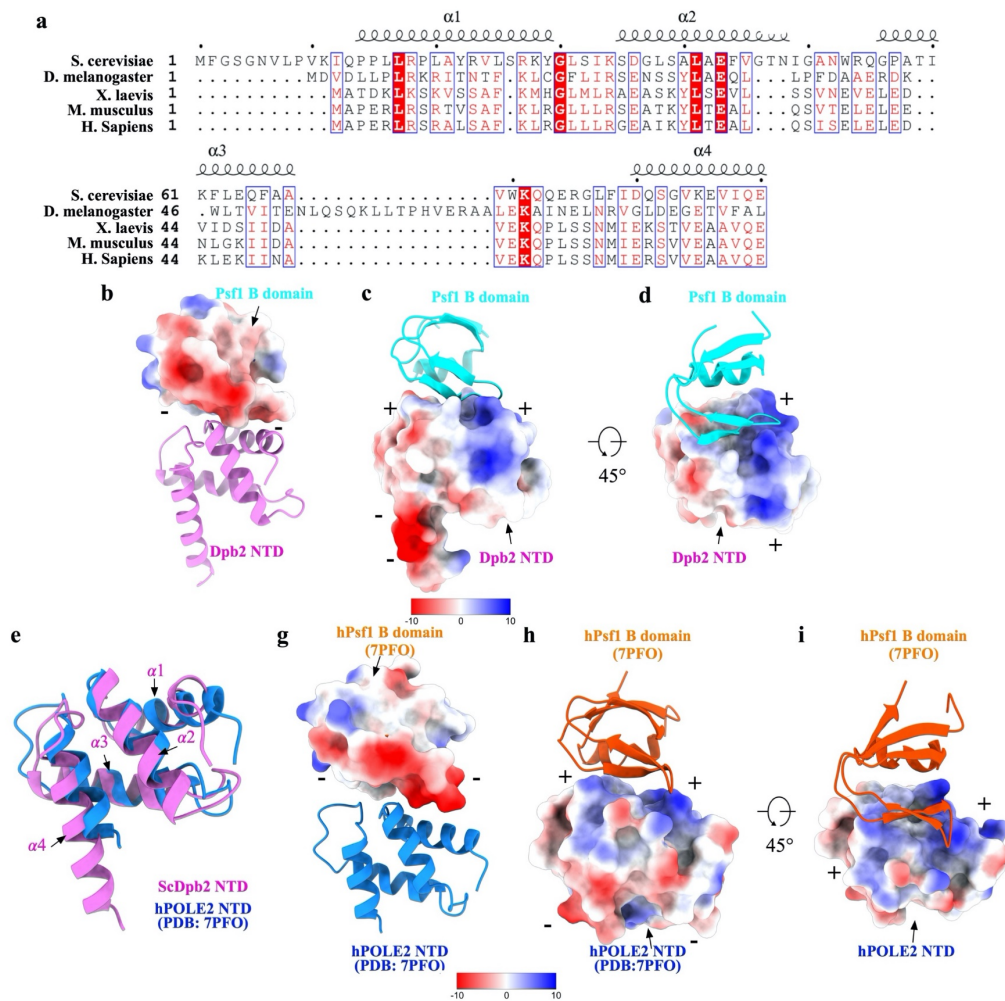

### Supplementary Figure 3. Electrostatic analysis of Dpb2-Psf1 interface.

(a) Multiple sequence alignment of Dpb2-NTD from various species as indicated. The locations of  $\alpha$  helices are labelled at top.

(b-d) Interaction between Psf1 B domain and Dpb2-NTD. The electrostatic surface potential maps of these two domains, calculated are displayed in (b) and (c) respectively. (c) is same as (b) but with indicated rotation, highlighting a polarized pattern of the surface charge on Dpb2-NTD.

(e) hPOLE2-NTD from a human replisome structure (PDB: 7PFO) is superimposed with ScDpb2-NTD from our yeast replisome structure.

(f-h) same as (a-c) but shown with hPOLE2-NTD and hPsf1 B domain (PDB: 7PFO).

The electrostatic potentials were calculated with the APBS plugin in ChimeraX using the default settings and displayed with a range of  $\pm 10$  kT/e.

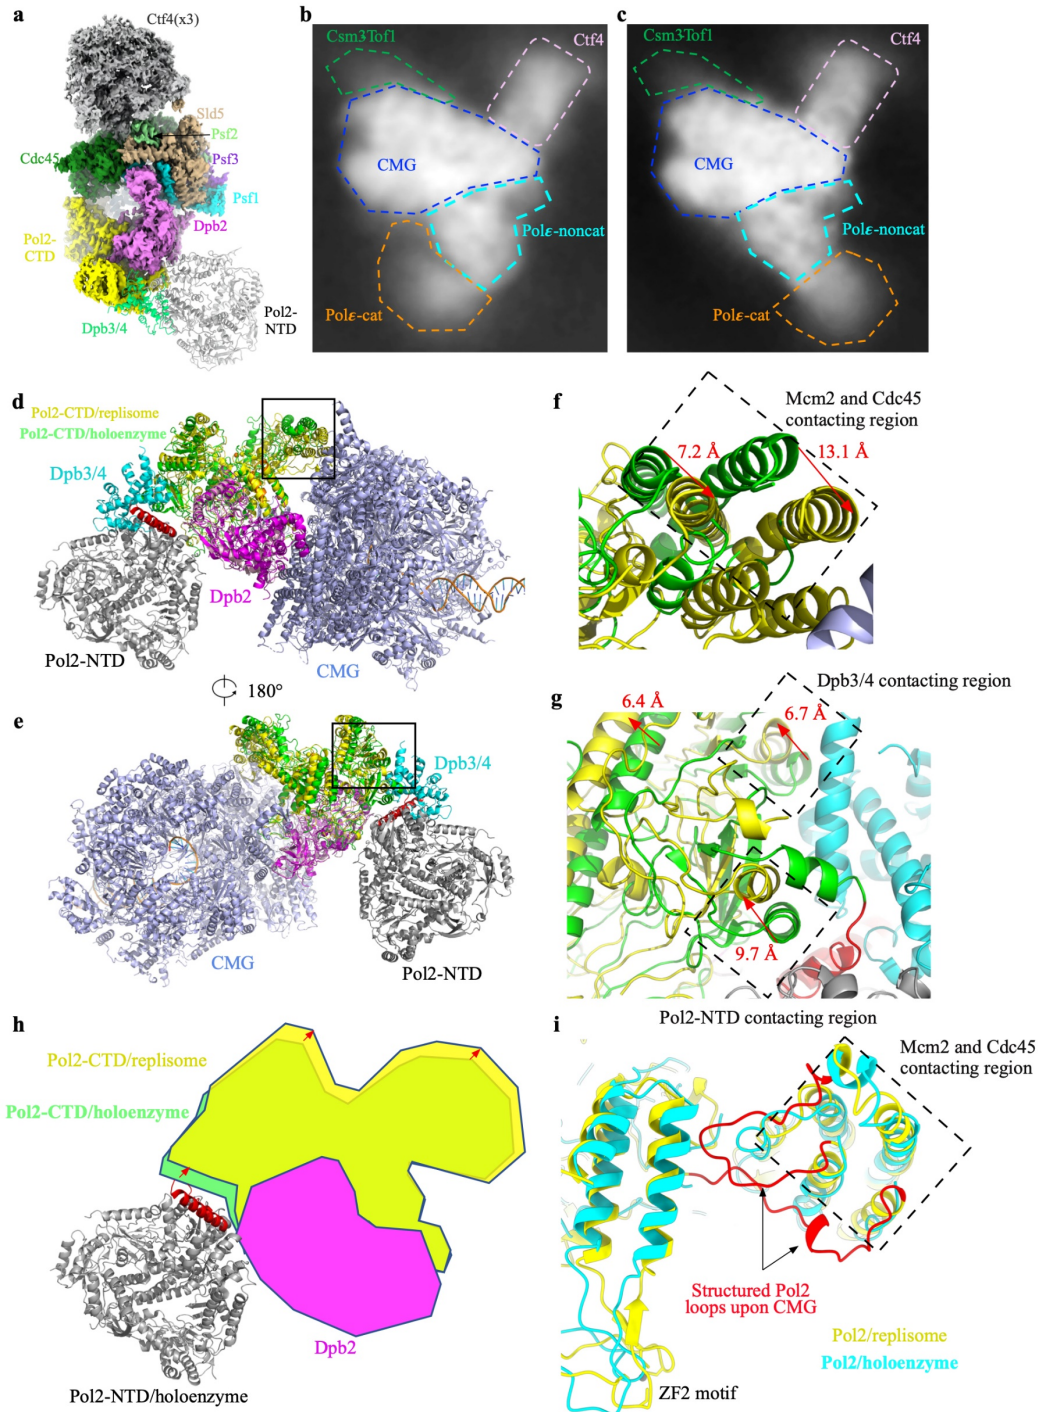

**Supplementary Figure 4. Conformational changes in Pol2 upon MCM binding.**

- (a) Density map of the leading-strand replisome superimposed with the atomic model of Polε holoenzyme, highlighting a flexible Pol2-NTD and Dpb3/4 in the replisome.
- (b, c) Two representative 2D average images showing diffuse signals of Pol2 catalytic NTD.
- (d, e) Superimposition of Polε structures from the leading-strand replisome and the holoenzyme using Dpb2 as a reference. Relevant subunits and domains are color coded and labelled as indicated.



- (f, g)** Zoomed-in views of the boxed regions in **(d)** and **(e)**. Conformational changes exemplified by displacement of several helices are marked by red arrows.
- (h)** Schematic illustration of rotational shift in Pol2-CTD induced by Pol $\epsilon$  binding to MCM ring.
- (i)** Upon MCM binding, Pol2-M2C45BD flanking loops (red) become structured. Mcm2 and Cdc45 contacting region in Pol2 is boxed.

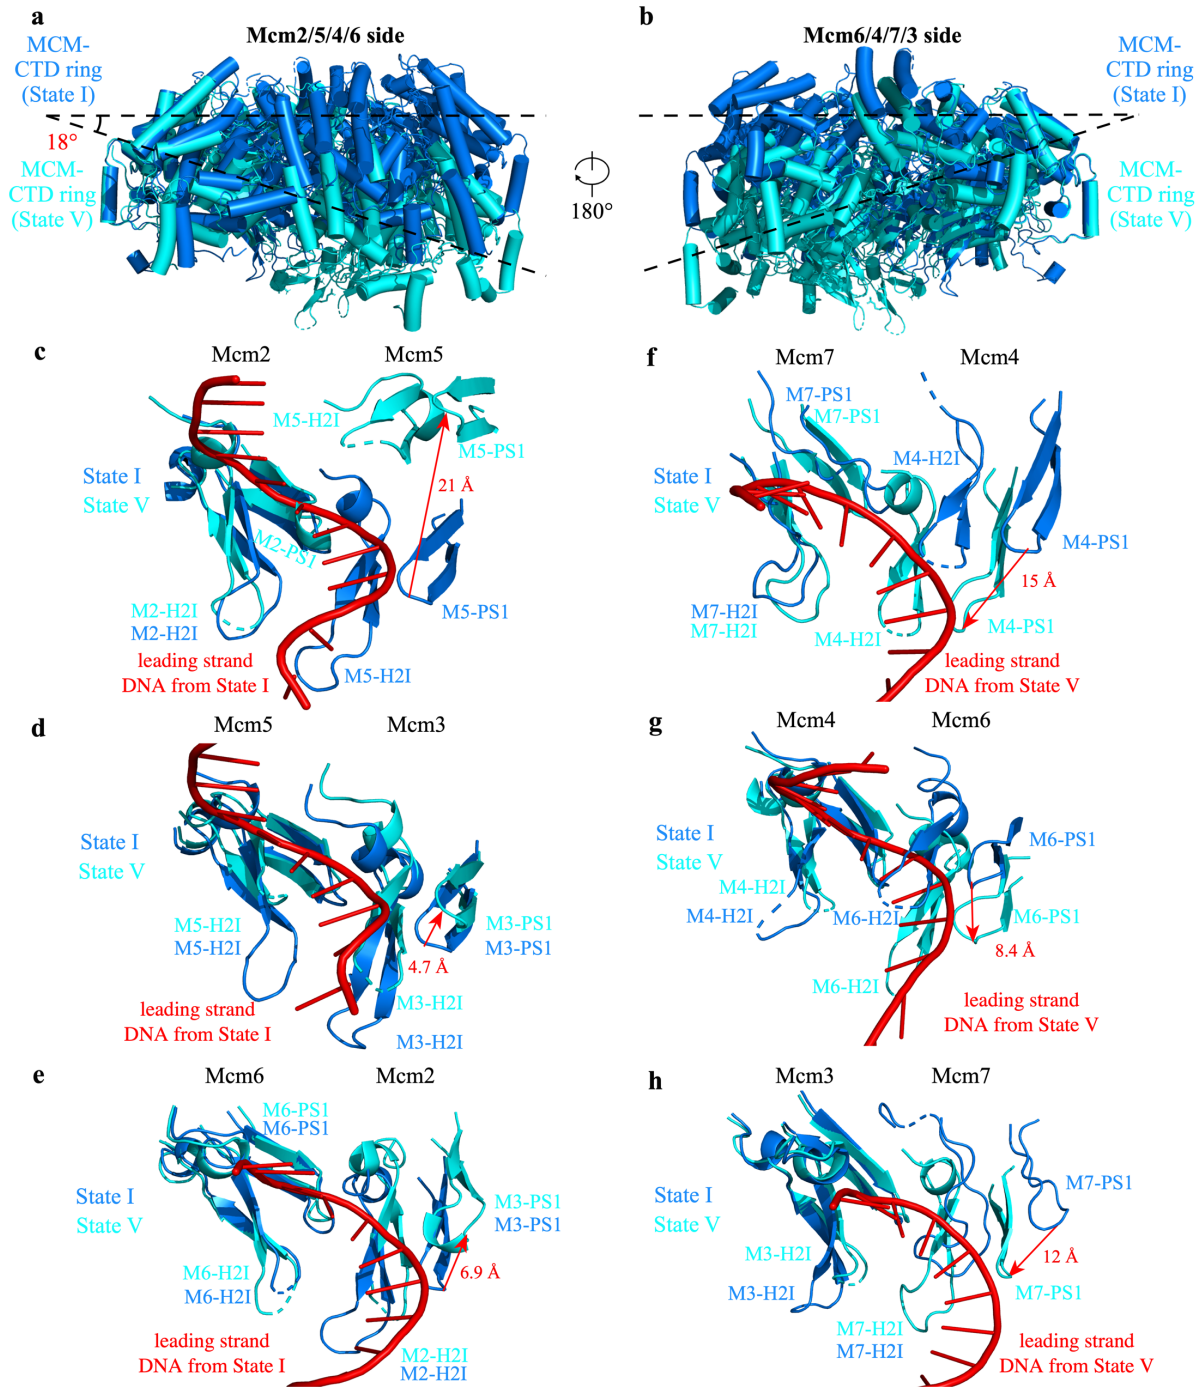

**Supplementary Figure 5. DNA translocation driven by displacement of ATPase loops around the motor domains of the MCM ring.**

(a, b) Superimposition of the MCM-CTD rings from State I and State V using Mcm3 as a reference, highlighting the orientation change of the MCM motor domain.

(c-h) Comparison of H2I and PS1 loops of each inter-subunit interface from State I (blue) and State V (cyan) showing movement of ATPase loops for DNA threading. Loops of the left subunit used as a reference for superimposition. For clarity, DNA from State V replisome is

not shown in **(c-e)**; and DNA from State I not shown in **(f-h)**. The directions and distances of PS1 displacements are marked with red arrows.

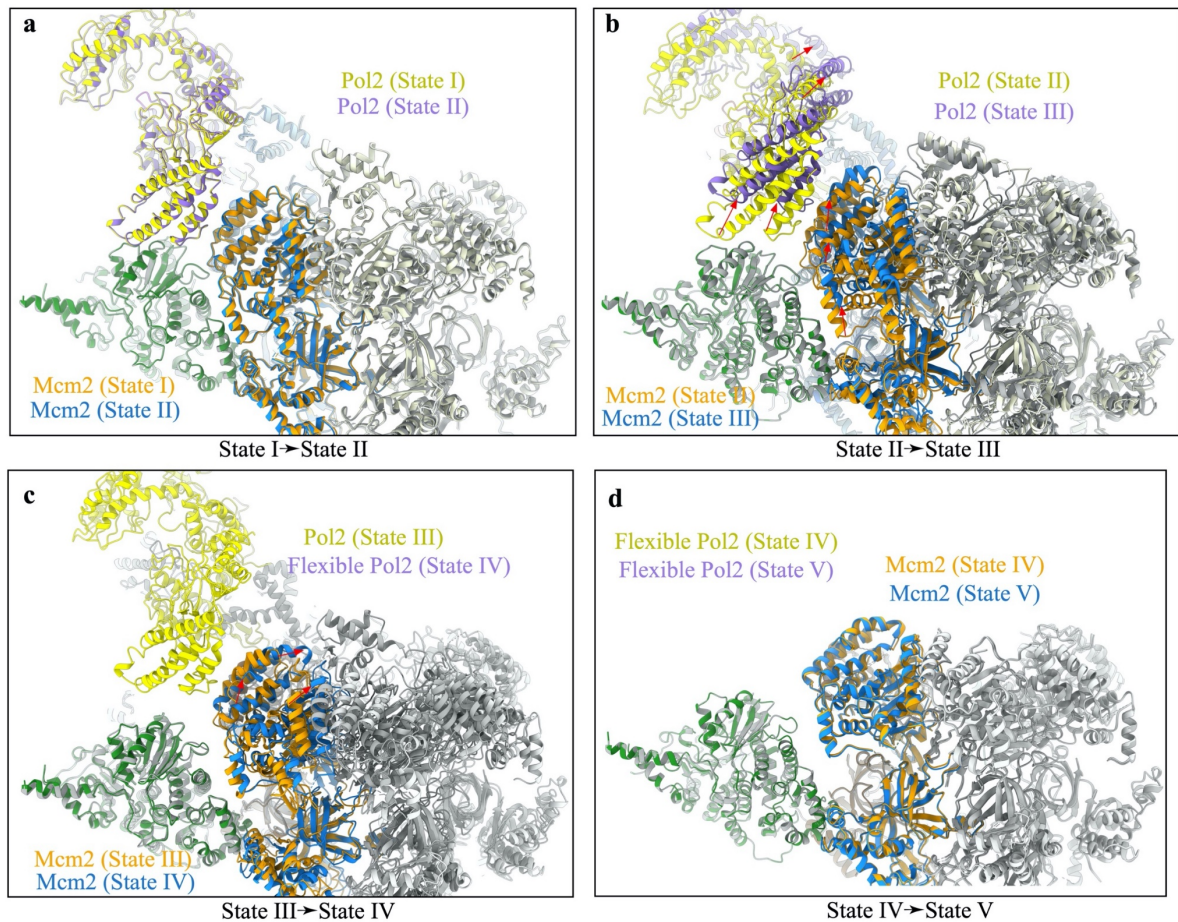

**Supplementary Figure 6. Pole stability correlated with rotational movement of DNA around MCM pore.**

(a-f) Superimposition of indicated structures with Cdc45 as a reference, illustrating conformational changes in Pol2 and Mcm2-CTD between the indicated states of replisome as highlighted by red arrows.

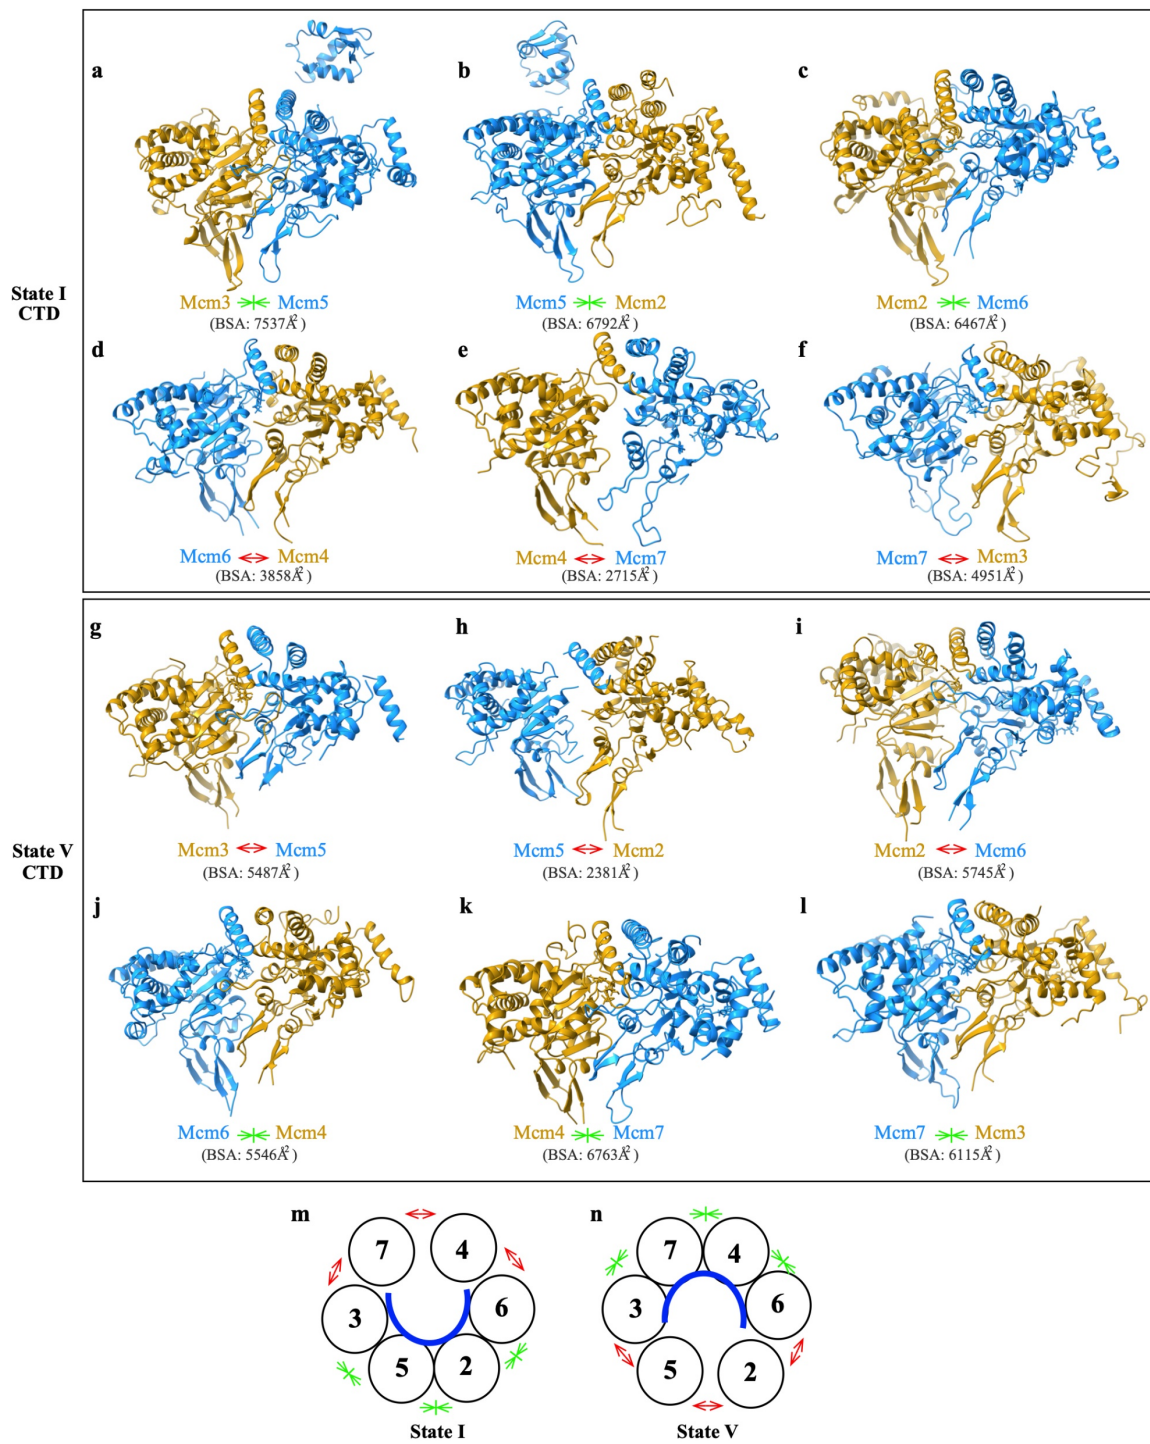

**Supplementary Figure 7. DNA translocation and CTD interfaces around MCM ring.**

Inter-CTD interactions around the MCM rings from the replisomes State I (a-f) and State V (g-l). The buried surface areas (BSAs) of their interfaces are labeled accordingly. (m-n) Schematic organization of CTD interfaces and DNA around the MCM ring for State I (m) and State V (n).

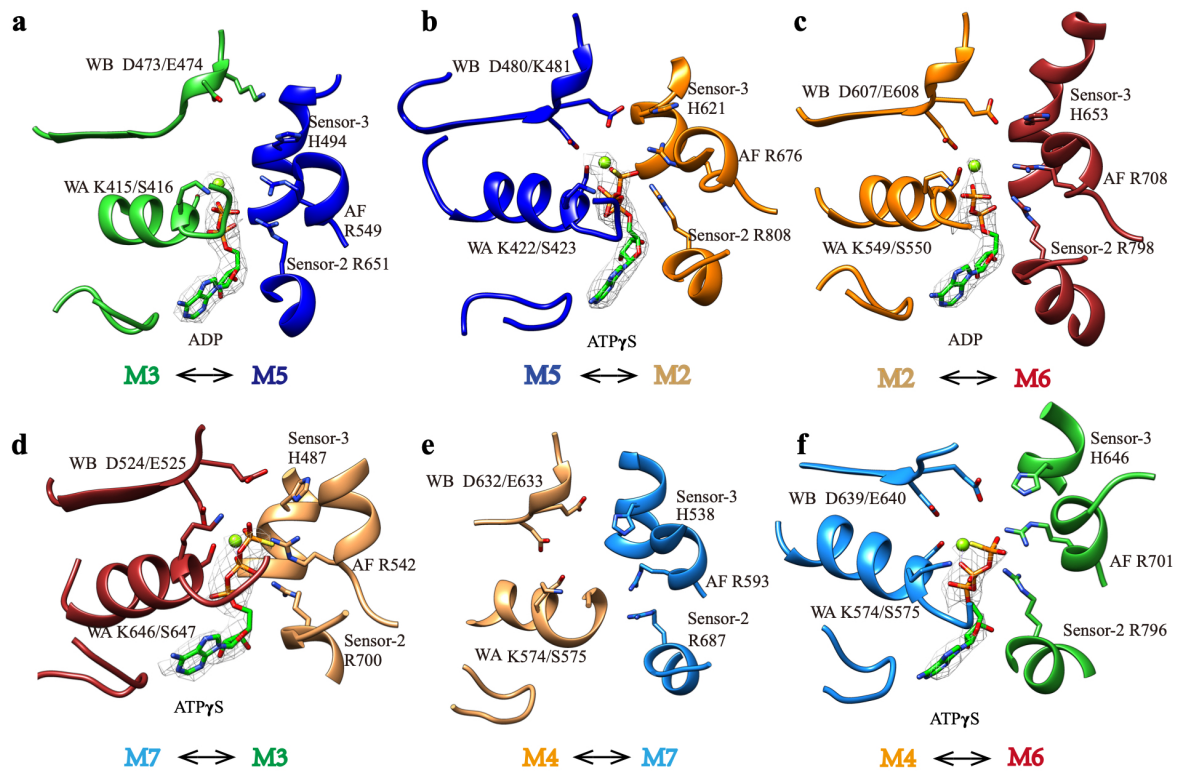

**Supplementary Figure 8. Nucleotide occupancy at the ATPase centers of MCM ring in State I replisome.**

(a-f) The active centers for each MCM dimer from State I replisome with the conserved ATPase elements labelled. Segmented nucleotide densities (gray mesh) were superimposed.  $Mg^{2+}$  is shown as green sphere.

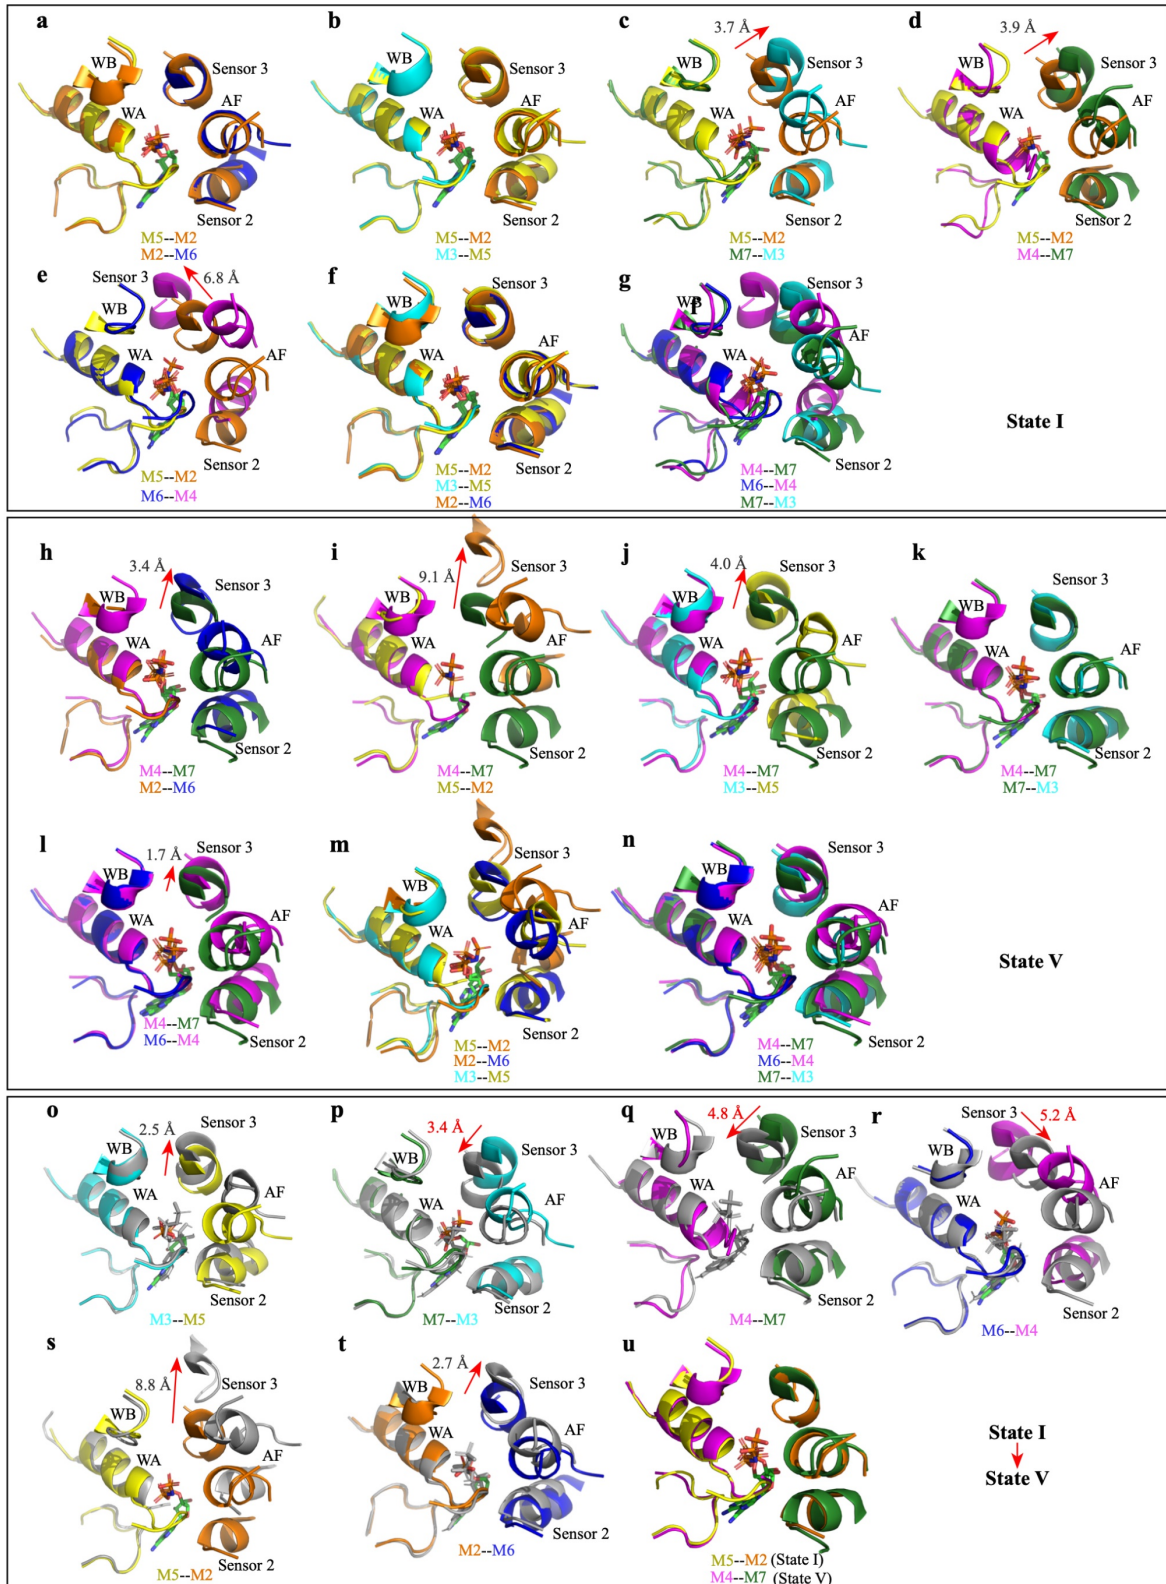

**Supplementary Figure 9. ATPase active center configurations at inter-subunit interfaces of the MCM ring.**

(a-e) Superimposition of ATP-binding sites of Mcm5:2 with other indicated the centers from State I replisome. The walker A and B (WA and WB, respectively) of the left subunit and

sensor 3, sensor 2 and arginine finger (AF) of the right subunit are displayed in cartoon presentation.

**(f-g)** Superimposition of three compact ATPase centers from 3:5, 5:2 and 2:6 **(f)** and three loose ATPase centers from 4:7, 6:4 and 7:3 **(g)**.

**(h-n)** same as **(a-g)** but with the centers from State V replisome.

**(o-t)** Comparison of each ATPase center from State I and State V highlighting their conformational differences.

**(u)** Superimposition of the center of 5:2 (State I) with that of 4:7 (State V)

Walker A and B motifs are used as a reference for alignment in all panels. The directions and distances of sensor 3 movements are marked with red arrows.



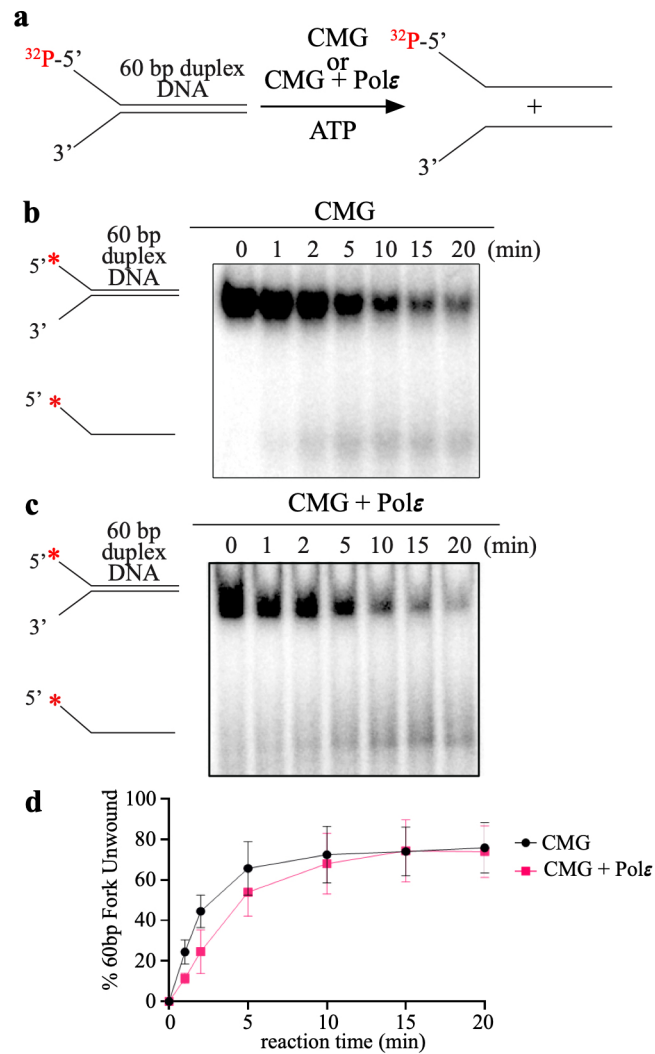

**Supplementary Figure 10. The effect of Polε on CMG helicase activity *in vitro*.**

(a) Schematic illustration of unwinding of a 60-bp forked DNA by CMG.

(b-c) Native PAGE of CMG helicase assays performed as in a in the absence (b) or presence

(c) of Polε. (d) Quantification of the results. Data are presented as mean values +/- SEM

(n=3). Source data are provided as a Source Data file.

**Supplementary Table 1. Cryo-EM data collection, refinement, and validation statistics**

| Replisome                                     |                                   |                                    |                                     |                                    |                                   |
|-----------------------------------------------|-----------------------------------|------------------------------------|-------------------------------------|------------------------------------|-----------------------------------|
|                                               | State I<br>EMD-37211<br>PDB: 8KG6 | State II<br>EMD-37213<br>PDB: 8KG8 | State III<br>EMD-37215<br>PDB: 8KG9 | State IV<br>EMD-37345<br>PDB: 8W7S | State V<br>EMD-37343<br>PDB: 8W7M |
| Data Collection/Processing                    |                                   |                                    |                                     |                                    |                                   |
| Voltage (kV)                                  | 300                               |                                    |                                     |                                    |                                   |
| Magnification                                 | 81,000                            |                                    |                                     |                                    |                                   |
| Defocus Range ( $\mu\text{m}$ )               | -1 ~ -2.5                         |                                    |                                     |                                    |                                   |
| Pixel Size ( $\text{\AA}$ )                   | 1.06                              |                                    |                                     |                                    |                                   |
| Symmetry imposed                              | C1                                |                                    |                                     |                                    |                                   |
| Total Electron Dose<br>( $e^-/\text{\AA}^2$ ) | 53.13                             |                                    |                                     |                                    |                                   |
| Exposure Time (s)                             | 4.5                               |                                    |                                     |                                    |                                   |
| Number of Images                              | 21,776                            |                                    |                                     |                                    |                                   |
| Number of Frames                              | 40                                |                                    |                                     |                                    |                                   |
| Initial Particle<br>Number                    | 2110,601                          |                                    |                                     |                                    |                                   |
| Final Particle<br>Number                      | 384,519                           | 147,795                            | 17,199                              | 7,939                              | 28,871                            |
| Resolution<br>(unmasked, $\text{\AA}$ )       | 4.1                               | 7.8                                | 8.7                                 | 13                                 | 7.7                               |
| Resolution (masked,<br>$\text{\AA}$ )         | 3.07                              | 4.23                               | 4.52                                | 7.29                               | 4.12                              |
| FSC threshold                                 | 0.143                             |                                    |                                     |                                    |                                   |

| Refinement                                        | State I |
|---------------------------------------------------|---------|
| <b>Model resolution (<math>\text{\AA}</math>)</b> | 3.3     |
| <b>FSC threshold</b>                              | 0.5     |
| <b>Model composition</b>                          |         |
| <b>Protein Residues</b>                           | 8713    |
| <b>Nucleotides</b>                                | 57      |
| <b>Ligand</b>                                     | 17      |
| <b>B factor (<math>\text{\AA}^2</math>)</b>       |         |
| <b>Protein</b>                                    | 140.66  |
| <b>Nucleotide</b>                                 | 276.41  |
| <b>Ligand</b>                                     | 76.39   |
| <b>RMS Deviations</b>                             |         |
| <b>Bond Lengths (<math>\text{\AA}</math>)</b>     | 0.004   |
| <b>Bond Angles (<math>^\circ</math>)</b>          | 0.525   |
| <b>Ramachandran</b>                               |         |
| <b>Favored (%)</b>                                | 95.00   |
| <b>Allowed (%)</b>                                | 5.00    |
| <b>Outlier (%)</b>                                | 0.00    |
| <b>Molprobrity Score</b>                          | 1.85    |

**Supplementary Table 2. Yeast strains used in this study**

| Yeast Strain | Genotype                                                                                                                                                                                                                                                                                                                | Source              |
|--------------|-------------------------------------------------------------------------------------------------------------------------------------------------------------------------------------------------------------------------------------------------------------------------------------------------------------------------|---------------------|
| yJCZ2        | <i>MATa / MATα ade2-1 ura3-1 his3-11,15 trp1-1 leu2-3,112 can1-100 bar1::Hyg pep4::KanMX his::HIS pRS303-CDC45iFLAG2 (pJY13) trp1::TRP1 pRS304-MCM4/MCM5 (pJF3) trp1::TRP1 pRS304-PSF1/SLD5 (pJCZ1) ura3::URA3 pRS306-MCM2/3×FLAG-MCM3 (pJF6) leu2::LEU2 pRS305-MCM6/MCM7 (pJF4) leu2::LEU2pRS305-PSF2/PSF3 (pJCZ2)</i> | Zhou et al., 2017   |
| yAE48        | <i>MATa ade2-1 ura3-1 his3-11,15 trp1-1 leu2-3,112 can1-100 bar1::Hyg pep4::KanMX ura3::URA3 pRS306-CBP-TEV-CSM3/TOF1</i>                                                                                                                                                                                               | Yeeles et al., 2017 |
| yAE31        | <i>MATa ade2-1 ura3-1 his3-11,15 trp1-1 leu2-3,112 can1-100 bar1::Hyg pep4::KanMX his3::HIS3 pRS303-CBP-TEV-RFA1 ura3::URA3 pRS306-RFA2/RFA3</i>                                                                                                                                                                        | Yeeles et al., 2015 |
| yXZ1         | <i>MATa ade2-1 ura3-1 his3-11,15 trp1-1 leu2-3,112 can1-100 bar1::Hyg pep4::KanMX trp:: TRP1 pRS404-DPB3/DPB4-TEV-HIS leu:: LEU2 pRS405-3×FLAG-TEV-DPB2 pESC-HIS-CBP-TEV-POL2</i>                                                                                                                                       | This study          |
| yXZ2         | <i>MATa ade2-1 ura3-1 his3-11,15 trp1-1 leu2-3,112 can1-100 bar1::Hyg pep4::KanMX trp:: TRP1 pRS404-DPB3/DPB4-TEV-HIS leu:: LEU2 pRS405-3×FLAG-TEV-dpb2ΔNTD(Δ2-90) pESC-HIS-CBP-TEV-POL2</i>                                                                                                                            | This study          |
| yXZ3         | <i>MATa ade2-1 ura3-1 his3-11,15 trp1-1 leu2-3,112 can1-100 bar1::Hyg pep4::KanMX trp:: TRP1 pRS404-DPB3/DPB4-TEV-HIS leu:: LEU2 pRS405-3×FLAG-TEV-dpb2ΔNTD(Δ2-90) pESC-HIS-CBP-TEV-pol2ΔDS2(Δ2023-2027Δ2069-2091)</i>                                                                                                  | This study          |
| yXZ4         | <i>MATa ade2-1 ura3-1 his3-11,15 trp1-1 leu2-3,112 can1-100 bar1::Hyg pep4::KanMX trp:: TRP1 pRS404-DPB3/DPB4-TEV-HIS leu:: LEU2 pRS405-3×FLAG-TEV-dpb2ΔNTD(2-</i>                                                                                                                                                      | This study          |

|         |                                                                                                                                                                                                                                                                                                    |                             |
|---------|----------------------------------------------------------------------------------------------------------------------------------------------------------------------------------------------------------------------------------------------------------------------------------------------------|-----------------------------|
|         | 90) <i>pESC-HIS-CBP-TEV-pol2ΔDS2+4(Δ1778-1784Δ2162-2186Δ2023-2027Δ2069-2091)</i>                                                                                                                                                                                                                   |                             |
| yXZ5    | <i>MATa ade2-1 ura3-1 his3-11,15 trp1-1 leu2-3,112 can1-100 bar1::Hyg pep4::KanMX trp:: TRP1 pRS404-DPB3/DPB4-TEV-HIS leu:: LEU2 pRS405-3×FLAG-TEV-DPB2 pESC-HIS-CBP-TEV-pol2ΔDS2(Δ2023-2027Δ2069-2091)</i>                                                                                        | This study                  |
| yXZ6    | <i>MATa ade2-1 ura3-1 his3-11,15 trp1-1 leu2-3,112 can1-100 bar1::Hyg pep4::KanMX trp:: TRP1 pRS404-DPB3/DPB4-TEV-HIS leu:: LEU2 pRS405-3×FLAG-TEV-DPB2 pESC-HIS-CBP-TEV-pol2ΔDS2+4(Δ1778-1784Δ2162-2186Δ2023-2027Δ2069-2091)</i>                                                                  | This study                  |
| YST2591 | <i>MATa ade2-1 ura3-1 his3-11,15 trp1-1 leu2-3,112 can1-100 Δbar1::hisG SSN6::pST1760 (bidirectional promoter-tTA(TetR-VP16)_TetR'-SSN6, TDH3p-OsTIR1, HIS3) Δpep4::URA3 PSF2-3×FLAG-1×HA(LEU2) MCM7-13×myc (TRP1, KanMX)</i>                                                                      | Miyazawa-Onami et al., 2017 |
| YST3085 | <i>MATa ade2-1 ura3-1 his3-11,15 trp1-1 leu2-3,112 can1-100 Δbar1::hisG leu2-3,112::pST1868 (bidirectional promoter between YBR188 &amp; 189-tTA(TetR-VP16)_TetR'-SSN6, TDH3p-OsTIR1, LEU2) HphNT-TetO2-POL2-3×minidegrom-KanMX MCM7-13×myc (TRP1, KanMX) PSF2-3×FLAG-1×HA(URA3) Δpep4::natNT1</i> | Miyazawa-Onami et al., 2017 |
| yHYJ105 | YST3085 <i>his3::HIS3 pRS403</i>                                                                                                                                                                                                                                                                   | This study                  |
| yHYJ106 | YST3085 <i>his3::HIS3 pRS403-POL2</i>                                                                                                                                                                                                                                                              | This study                  |
| yHYJ114 | YST3085 <i>his::HIS3 pRS403 pol2 ΔM2BD(Δ2069-2091)</i>                                                                                                                                                                                                                                             | This study                  |
| yHYJ115 | YST3085 <i>his::HIS3 pRS403 pol2 ΔDS2(Δ2023-2027Δ2069-2091)</i>                                                                                                                                                                                                                                    | This study                  |
| yHYJ109 | YST3085 <i>his::HIS3 pRS403 pol2 ΔM5BD(Δ1778-1784)</i>                                                                                                                                                                                                                                             | This study                  |
| yHYJ109 | YST3085 <i>his::HIS3 pRS403 pol2 ΔZF2(Δ2162-2186)</i>                                                                                                                                                                                                                                              | This study                  |
| yHYJ121 | YST3085 <i>his::HIS3 pRS403 pol2 ΔDS4(Δ1778-1784Δ2162-2186)</i>                                                                                                                                                                                                                                    | This study                  |

|         |                                                                                                                                   |            |
|---------|-----------------------------------------------------------------------------------------------------------------------------------|------------|
| yHYJ120 | YST3085 <i>his::HIS3 RS403 pol2</i> $\Delta$ M5BD+M2BD( $\Delta$ 1778-1784 $\Delta$ 2069-2091)                                    | This study |
| yHYJ122 | YST3085 <i>his::HIS3 pRS403 Pol2</i> $\Delta$ M2BD+ZF2( $\Delta$ 2069-2091 $\Delta$ 2162-2186)                                    | This study |
| yHYJ117 | YST3085 <i>his::HIS3 pRS403 pol2</i> $\Delta$ DS2+4( $\Delta$ 1778-1784 $\Delta$ 2023-2027 $\Delta$ 2069-2091 $\Delta$ 2162-2186) | This study |
