# Supplementary material for: Synergism between CMG helicase and leading strand DNA polymerase at replication fork
Source: PubMed Central journal article supplement (PMC10511561; doi:10.1038/s41467-023-41506-0), 2023-09-20
Supplement: 41467_2023_41506_MOESM3_ESM.pdf [file 41467_2023_41506_MOESM3_ESM.pdf]

## **Description of Additional Supplementary Files**

File Name: Supplementary Movie 1

Description: Mechanism coordinating DNA translocation by CMG and Pole docking to the motor domains of the MCM ring. Side (left) and MCM-CTD (right) views of the replisome illustrating its transition from State I to State V. The intermediate frames in between two states were interpolated by morphing. Subunits are color coded. Tof1-Csm3 and parental duplex DNA are not shown.
